# Supplementary material for: Enhancement and mechanism of nano-BaTiO3 piezocatalytic degradation of tricyclazole by co-loading Pt and RuO2
Source: Royal Society of Chemistry journal article supplement (doi:10.1039/c9en00367c), 2019-01-01
Supplement: c9en00367c1.pdf [file c9en00367c1.pdf]

*Supplementary Information for*

Enhancement and mechanism of nano-BaTiO<sub>3</sub> piezo-catalytic  
degradation of tricyclazole by co-loading Pt and RuO<sub>2</sub>

Jinxi Feng, Jingxiang Sun, Xiaosheng Liu, Jinzhu Zhu, Ya Xiong\*, Shuanghong Tian\*

School of Environmental Science and Engineering, Guangdong Provincial Key Laboratory of  
Environmental Pollution Control and Remediation Technology, Sun Yat-Sen University, no. 135,  
Xingang Xi Road, Guangzhou 510275, P. R.China

\* Corresponding author: Tel.: +86 20 84115556; fax: +86 20 39332690.

E-mail address: cesxya@mail.sysu.edu.cn

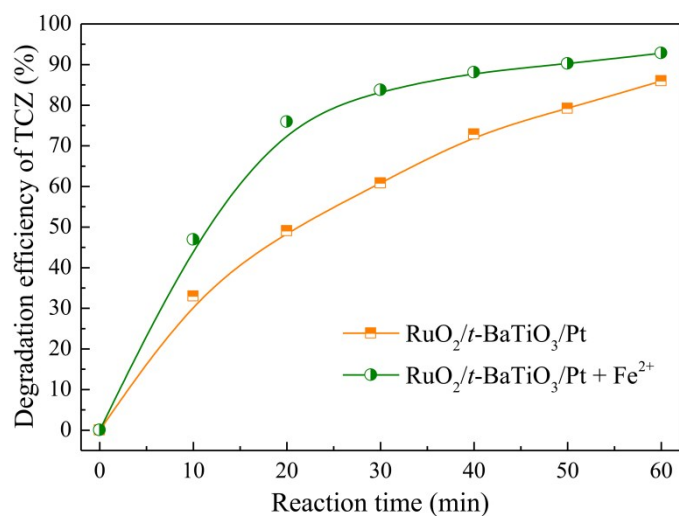

Fig. S1 Piezo-catalytic enhanced performance of Fe<sup>2+</sup> (0.03 g L<sup>-1</sup>) added into RuO<sub>2</sub>/t-BaTiO<sub>3</sub>/Pt piezo-system for TCZ (tricyclazole) degradation.

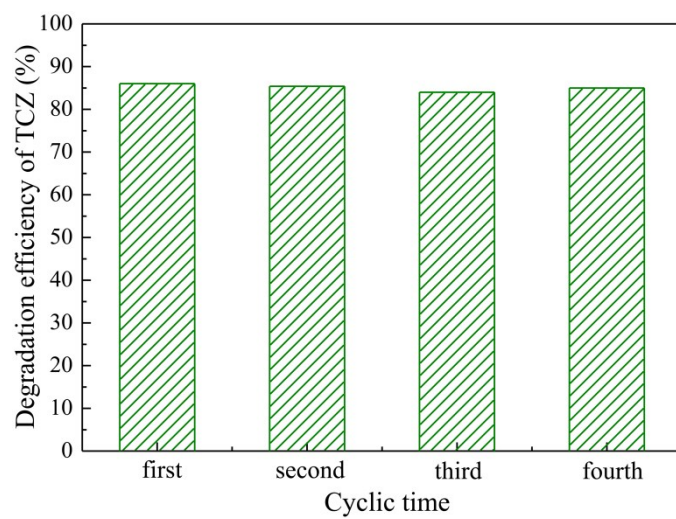

Fig. S2 Recycling experiments with  $\text{RuO}_2/t\text{-BaTiO}_3/\text{Pt}$  under piezo-catalytic process.
